# Supplementary material for: Improved osseointegration of strontium-modified titanium implants by regulating angiogenesis and macrophage polarization
Source: Royal Society of Chemistry journal article supplement (doi:10.1039/d1bm01488a), 2022-01-01
Supplement: d1bm01488a1.pdf [file d1bm01488a1.pdf]

## Supplemental materials

**Table 1. Primer sequences used for RT-qPCR.**

| Gene           | Cell            | Forward primers                             | Reverse primers         |
|----------------|-----------------|---------------------------------------------|-------------------------|
| VEGF $\alpha$  | HUVEC           | ATCGAGTACATCTTCAAGCCAT                      | GTGAGGTTTGATCCGCATAATC  |
| HIF-1 $\alpha$ | HUVEC           | ACGTTTCCTTCGATCAGTTGTC<br>ACC               | GGCAGTGGTAGTGGTGGCATTAG |
| FGF            | HUVEC           | CACAGACACCAAATGAGGAA TG                     | CATTCTTCTTGAGGCCAACAAA  |
| MMP2           | HUVEC           | ATTGTATTTGATGGCATCGCTC                      | ATTCATTCCCTGCAAAGAACAC  |
| ANG            | HUVEC           | ACCCTCACAGAGAAAACCTAAG                      | GACGACGGAAAATTGACTGATC  |
| TGF $\beta$ 1  | HUVEC           | CTGTACATTGACTTCCGCAAG                       | TGTCCAGGCTCCAAATGTAG    |
| SHH            | HUVEC           | GAGGAGTCTCTGCACTACGAG                       | GATATGTGCCTTGGACTCGTAG  |
| ALP            | hBMSC           | CTGGTACTCAGACAACGAGATG                      | GTCAATGTCCCTGATGTTATGC  |
| COL1           | hBMSC           | AAAGATGGACTCAACGGTCTC                       | CATCGTGAGCCTTCTCTTGAG   |
| OPN            | hBMSC           | TCACACATGGAAAGCGAGGAGT<br>TG <sub>SEP</sub> | ACTGTCCTTCCCACGGCTGTC   |
| IL-1 $\beta$   | Raw264.7        | GTTGACGGACCCCAAAGAT                         | TACTGCCTGCCTGAAGCTCT    |
| IL-6           | Raw264.7        | ACCCCAATTTCCAATGCTCT                        | CGCACTAGGTTTGCCGAGTA    |
| Arg            | Raw264.7        | CACACCAGCTACTGGCACACC                       | GCAACTGCTGTGTTCACTGTTCG |
| IL-1ra         | Raw264.7        | GGTGCCTATTGACCTTCATAGT                      | GATATCATCTCCAGACTTGGCA  |
| PDGF-BB        | Raw264.7        | CCACGCACTCATCTCTTCCT                        | CACGCACACTGCACCTCTAA    |
| GAPDH          | HUVEC/h<br>BMSC | AGATCCCTCCAAAATCAAGTGG                      | GGCAGAGATGATGACCCTTTT   |
| GAPDH          | Raw264.7        | TGACCACAGTCCATGCCATC                        | GACGGACACATTGGGGGTAG    |

**Table 2. CT values for RT-qPCR.**

| group          | Blank    |        |        | SLA      |        |        | SLA-Sr   |        |        |
|----------------|----------|--------|--------|----------|--------|--------|----------|--------|--------|
| gene           | Ct Value |        |        | Ct Value |        |        | Ct Value |        |        |
| VEGF $\alpha$  | 24.070   | 24.410 | 24.309 | 23.989   | 24.329 | 24.228 | 23.748   | 23.800 | 23.698 |
| HIF-1 $\alpha$ | 21.958   | 22.355 | 22.780 | 21.454   | 21.958 | 22.596 | 19.707   | 19.719 | 20.087 |
| FGF            | 29.380   | 29.300 | 29.220 | 29.139   | 29.059 | 28.979 | 28.899   | 28.818 | 28.738 |
| MMP2           | 29.380   | 29.300 | 29.220 | 29.139   | 29.059 | 28.979 | 28.899   | 28.818 | 28.738 |
| ALP            | 18.321   | 17.075 | 15.829 | 14.583   | 13.337 | 12.091 | 10.845   | 9.599  | 8.353  |
| COL1           | 16.564   | 17.455 | 16.860 | 16.683   | 17.574 | 16.979 | 16.091   | 16.134 | 16.439 |
| OPN            | 31.317   | 31.366 | 30.163 | 30.049   | 30.098 | 28.895 | 29.199   | 29.580 | 28.809 |
| IL-1 $\beta$   | 29.757   | 29.884 | 29.862 | 28.862   | 28.860 | 28.653 | 29.593   | 29.720 | 29.698 |
| IL-6           | 26.442   | 26.589 | 26.868 | 24.004   | 24.151 | 24.430 | 28.522   | 28.031 | 28.141 |
| IL-1ra         | 24.425   | 23.348 | 23.392 | 23.654   | 22.577 | 22.621 | 22.271   | 22.209 | 22.374 |
| PDGF-BB        | 25.083   | 25.377 | 25.223 | 23.180   | 24.175 | 33.966 | 23.477   | 22.413 | 22.465 |
| ANG            | 26.945   | 26.896 | 27.345 | 24.918   | 24.975 | 24.730 | 24.928   | 24.938 | 24.842 |
| MMP2           | 21.762   | 21.706 | 21.853 | 19.796   | 19.740 | 19.887 | 19.150   | 19.209 | 19.074 |
| TGF $\beta$ 1  | 21.933   | 21.954 | 21.988 | 20.316   | 20.337 | 20.371 | 20.286   | 20.313 | 20.289 |
| SHH            | 21.831   | 21.785 | 21.823 | 19.530   | 19.484 | 19.522 | 19.397   | 19.364 | 19.393 |
